# Supplementary material for: Facile bile salt-induced synthesis of porous MnO2 nanoflowers: applications in dye removal and oxidation
Source: Springer Nature journal article supplement (doi:10.1007/s42452-020-03731-w), 2020-11-10
Supplement: MOESM1 [file 42452_2020_3731_MOESM1_ESM.docx]

**Facile Bile Salt-induced Synthesis of Mesoporous MnO2 Nanoflowers: Applications in Dye removal and Oxidation**

Ajay Kumar and Uday Maitra*

Department of Organic Chemistry, Indian Institute of Science

Bangalore: 560012, India

*Email: maitra@iisc.ac.in

**Table of contents**

Page no.

UV indication for the completion of the reaction 2

Kinetics of KMnO4 reduction by sodium cholate (NaCh) 2

Fate of sodium cholate 3

PXRD analysis 4

Charge determination on HT-16-MnO2 (Zeta potential measurements) 5

HRTEM of RT-9-MnO2 6

UV spectra and molecular structure of MB and Rh6G 6

Comparison of dye adsorption capacity with reported methods 7

Adsorption attempt on an anionic dye 7

Kinetic models for dye adsorption 8

Recovery and reusability test of HT-16-MnO2 9

Solvent optimization for oxidation with MnO2 10

Comparison with commercial MnO2 11

NMR for products 11-14

Abbreviations[[1]](#footnote-1)


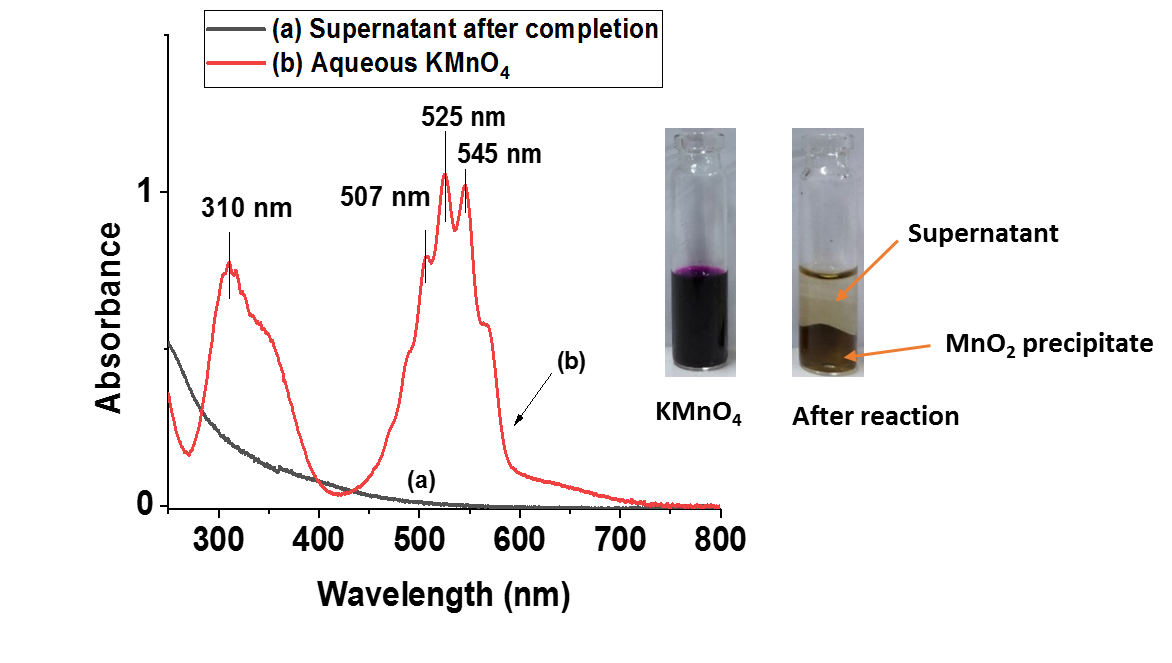


**Fig. S1** UV-Vis spectra of (**a**) supernatant after the completion of reaction for HT-16-MnO2 synthesis and (**b**) aqueous KMnO4 (the disappearance of the characteristic absorption peaks of MnO4- indicated the consumption of KMnO4 and hence completion of the reaction).

**
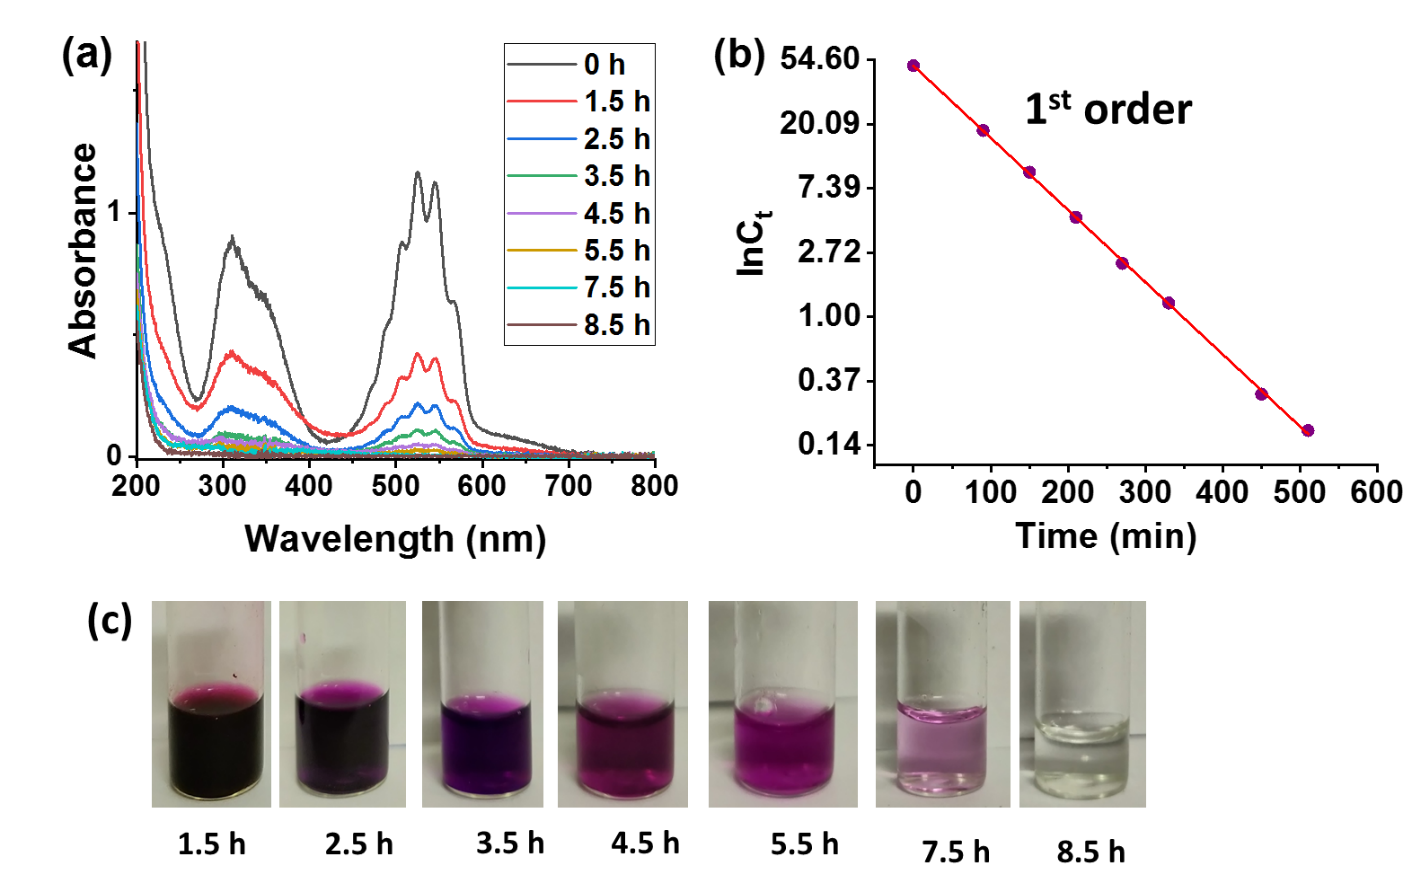
**

**Fig. S2** (**a**) UV-Vis spectra of KMnO4 reduction with NaCh during RT-9-MnO2 synthesis. (**b**) plot of InC vs Time (min) giving straight-line indicating first order kinetics of KMnO4 reduction **(c)** photos of filtered aliquots (filtered by 0.2 µm nylon membrane) during the progress of the reaction.

**Fate of sodium cholate**

After the reaction was complete, the reaction mixture was centrifuged and the MnO2 precipitate was separated. The supernatant (about 10 mL) was collected and acidified by 2 N aq. HCl (2 mL) until pH ~ 4 was reached. This solution was then extracted with CHCl3 (2×25 mL). The collected organic layer was dried over anhyd. Na2SO4 and the solvent was evaporated. The residue obtained was analysed by mass spectra and 1H NMR and was found to be 7‑ketocholic acid (**Fig S3** and **S4**).

**7‑ketocholic acid (Fig S3 and S4),** 1H NMR (400 MHz, CD3OD), δ 4.02 (s, 1H), 3.56 (m, 1H), 1.25 (s, 3H), 1.03 (d, 3H, J = 6.4 Hz), 0.76 (s, 3H), (m/z): [M+Na; C24H38O5Na], calcd. = 429.2617; found, 429.2615.


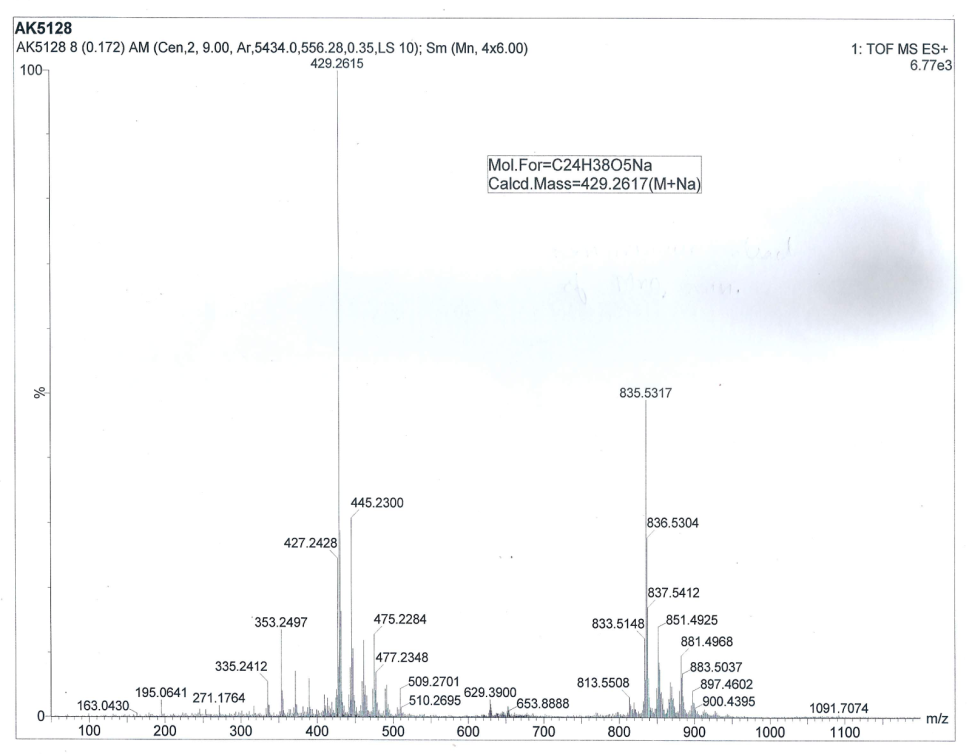


**Fig. S3** HRMS of 7‑ketocholic acid.

**Fig. S4** 1H NMR spectrum of 7-ketocholic acid (CD3OD).

**PXRD analysis**

**Table S1** d‑spacing values obtained from the powder XRD analysis of synthesized MnO2.

| Peaks (hkl) | 2θ (°) | D (Å) |
| --- | --- | --- |
| 001 | 12.4 | 7.13 |
| 002 | 24.9 | 3.57 |
| -111 | 37 | 2.42 |
| 020 | 66 | 1.41 |

**Fig. S5** EDX of the HT‑16‑MnO2

**Charge determination on HT-16-MnO2**


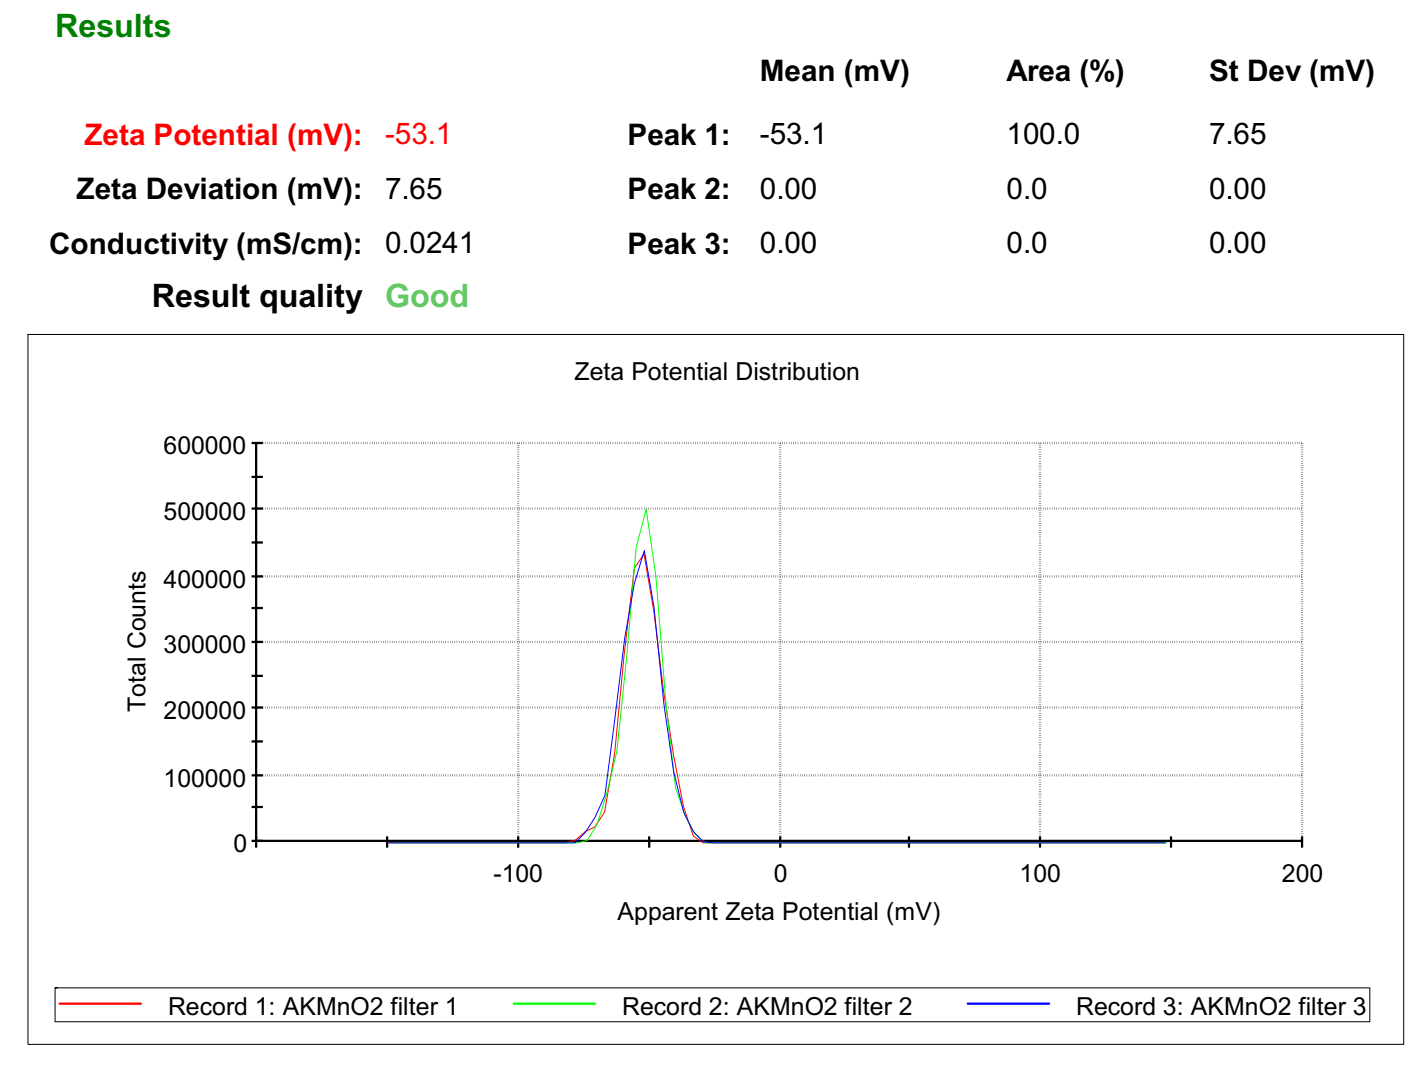


**Fig. S6** Zeta potential of the prepared HT-16-MnO2 showing negative charge (-53.1 mV) on the surface.

**HRTEM of RT-9-MnO2**

The much lower surface area for this sample might be due to agglomeration of material observed in the TEM imaging.

**Fig. S7** HRTEM image of the RT‑9‑MnO2 showing agglomerated morphology.


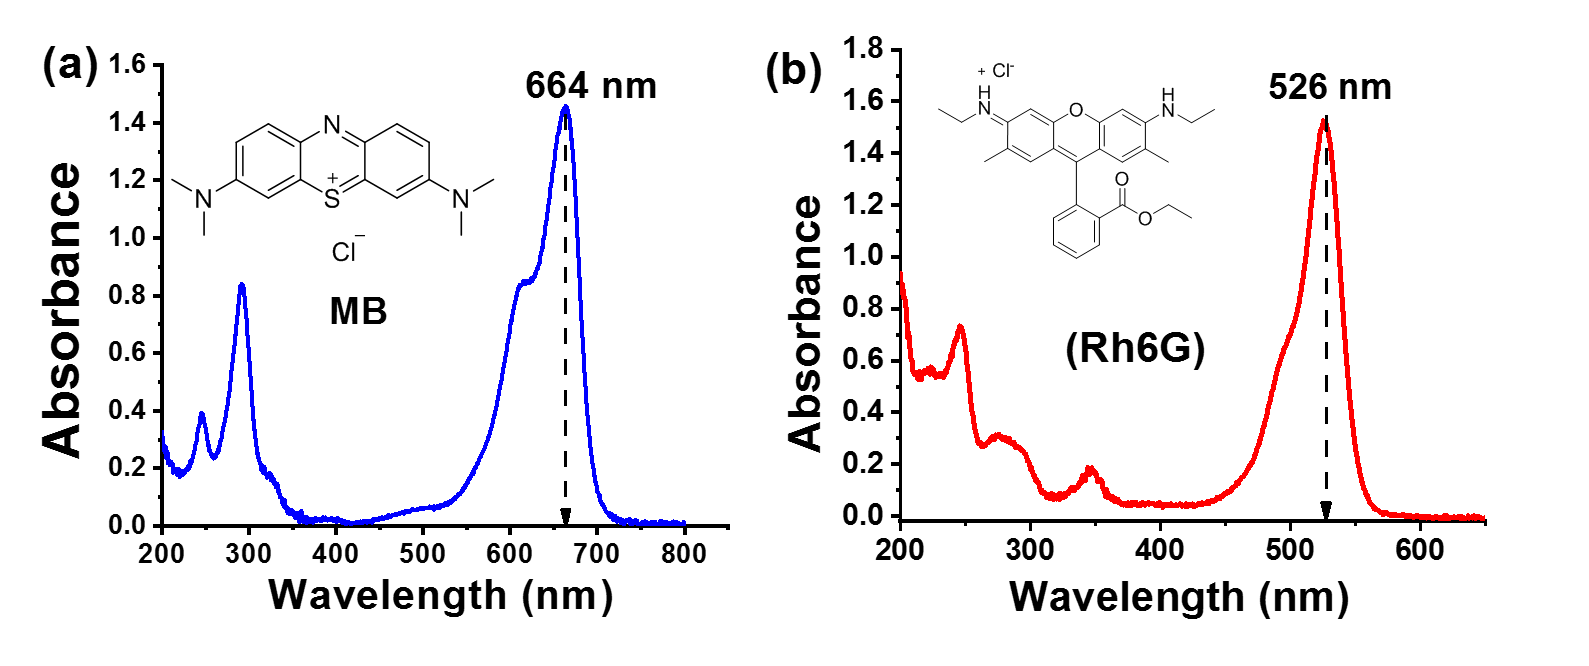


**Fig. S8** (a) UV-Vis spectra and molecular structure of methylene blue (MB). (b) UV-Vis spectra and molecular structure of Rhodamine 6G (Rh6G).

**Table S2**. Reported MB adsorption capacity and BET surface areas of various synthesized MnO2.

| Material used | MB adsorption, qmax (mg/g) | Surface area (m2g-1) | Reference |
| --- | --- | --- | --- |
| β-MnO2 | 33 | Not measured | [[[2]](#endnote-1)] |
| MnO2 | 41 | Not measured | [[[3]](#endnote-2)] |
| MnO2 nanocorals | 41.26 | 168.9 | [[[4]](#endnote-3)] |
| Layered MnO2 | 68.4 | 53.8 | [[[5]](#endnote-4)] |
| γ-MnO2 | 121.2 | Not measured | [[[6]](#endnote-5)] |
| γ-MnO2 | 83 | 169 | [[[7]](#endnote-6)] |
| MnO2 nanosheets | 45 | 214 | [[[8]](#endnote-7)] |
| γ-MnO2 | 50 | 41 | [[[9]](#endnote-8)] |
| δ-MnO2 | 88 | 140 | [[[10]](#endnote-9)] |
| δ-MnO2 | 194 | 280 | Our method |
| MnO2 nanostructures | 273.9 | 171.5 | [[[11]](#endnote-10)] |

**Attempted adsorption of an anionic dye**

**Methyl orange (MO) adsorption**: MO solutions (10 mL of 10 mg/L, 3.06 mM) were stirred in three separate set up with 6 mg of HT-16-MnO2 and commercial MnO2 such as MnO2 (TB)and MnO2 (SA) for 25 min at room temperature. The solutions were filtered through 0.2 μm nylon membranes and absorption spectra were recorded (**Fig. S7 a**). Removal efficiency for MnO2 (TB), MnO2 (SA) and HT‑16-MnO2 were 6%, 8%, and 0% respectively. Additionally, an experiment with a mixture of anionic (MO) and cationic dye (MB) was carried out and selective adsorption of cationic dye from the aqueous solution was observed (**Fig S7 c**).


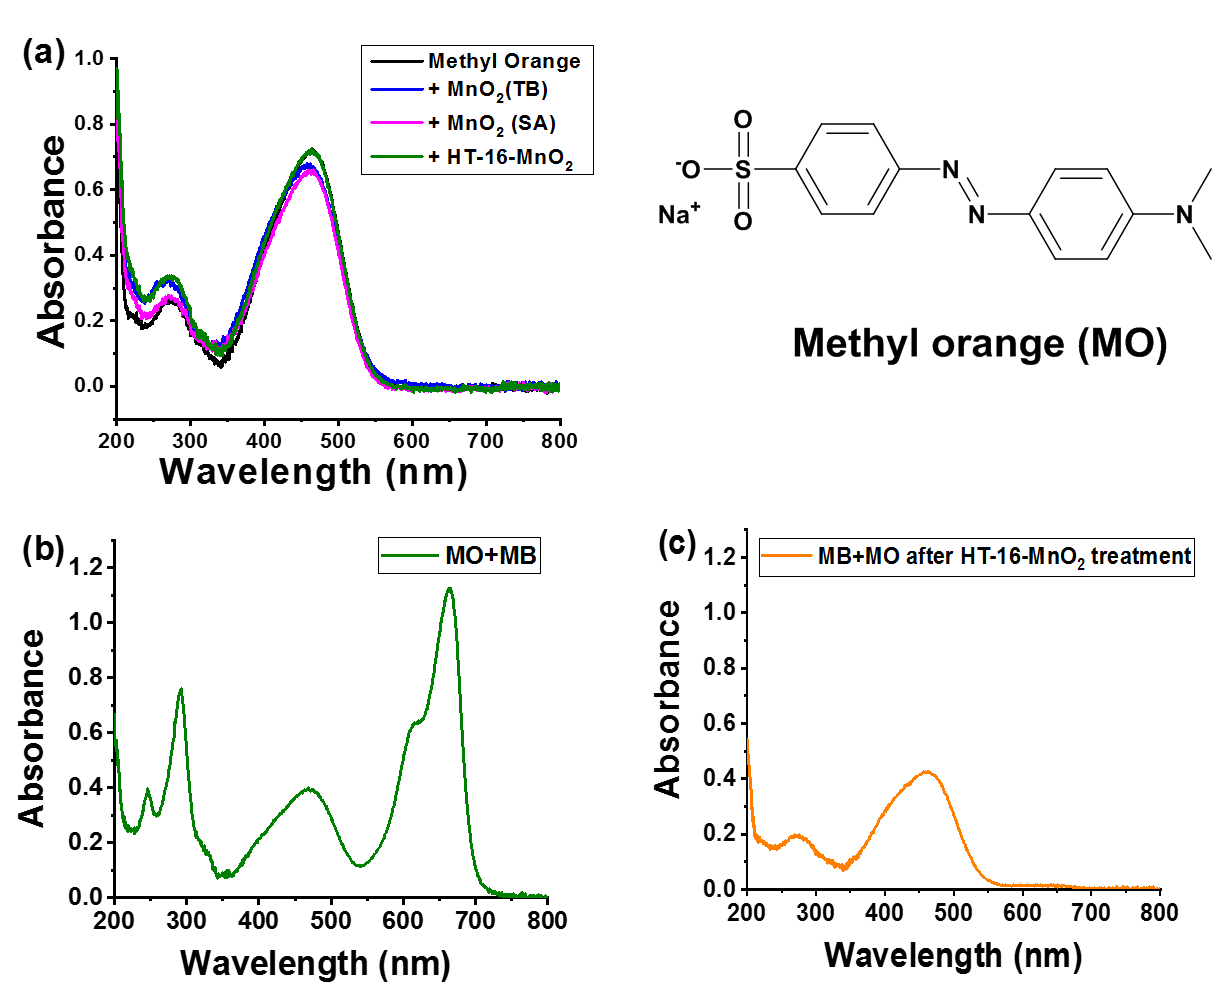


**Fig. S9** (**a**) UV‑Vis spectra of methyl orange (MO, 10 mg/L) after treatment with various sources of MnO2 (**b**) Absorption spectra of mixed MO and MB dye solution (5 mg/L) before and (**c**) HT‑16‑MnO2 treatment.

**Kinetic models for the adsorption of dyes**

The kinetics of MB and Rh6G adsorption were also studied using pseudo-first order and intraparticle diffusion. The linear form of the pseudo-first order and intraparticle diffusion are expressed in the Eq (1) and (2)

(1)

Where qe (µg/g) and qt (µg/g) are the amount of dye adsorbed at an equilibrium time, t (min), k1 is the pseudo-first order rate constant.

(2)

Where ki is the intaparticle rate constant and C is the intercept that provide information about the boundary layer thickness. These parameters were calculated from the slope and intercept of the linear plot **(Fig. S10)** and summarized in **Table S2.**


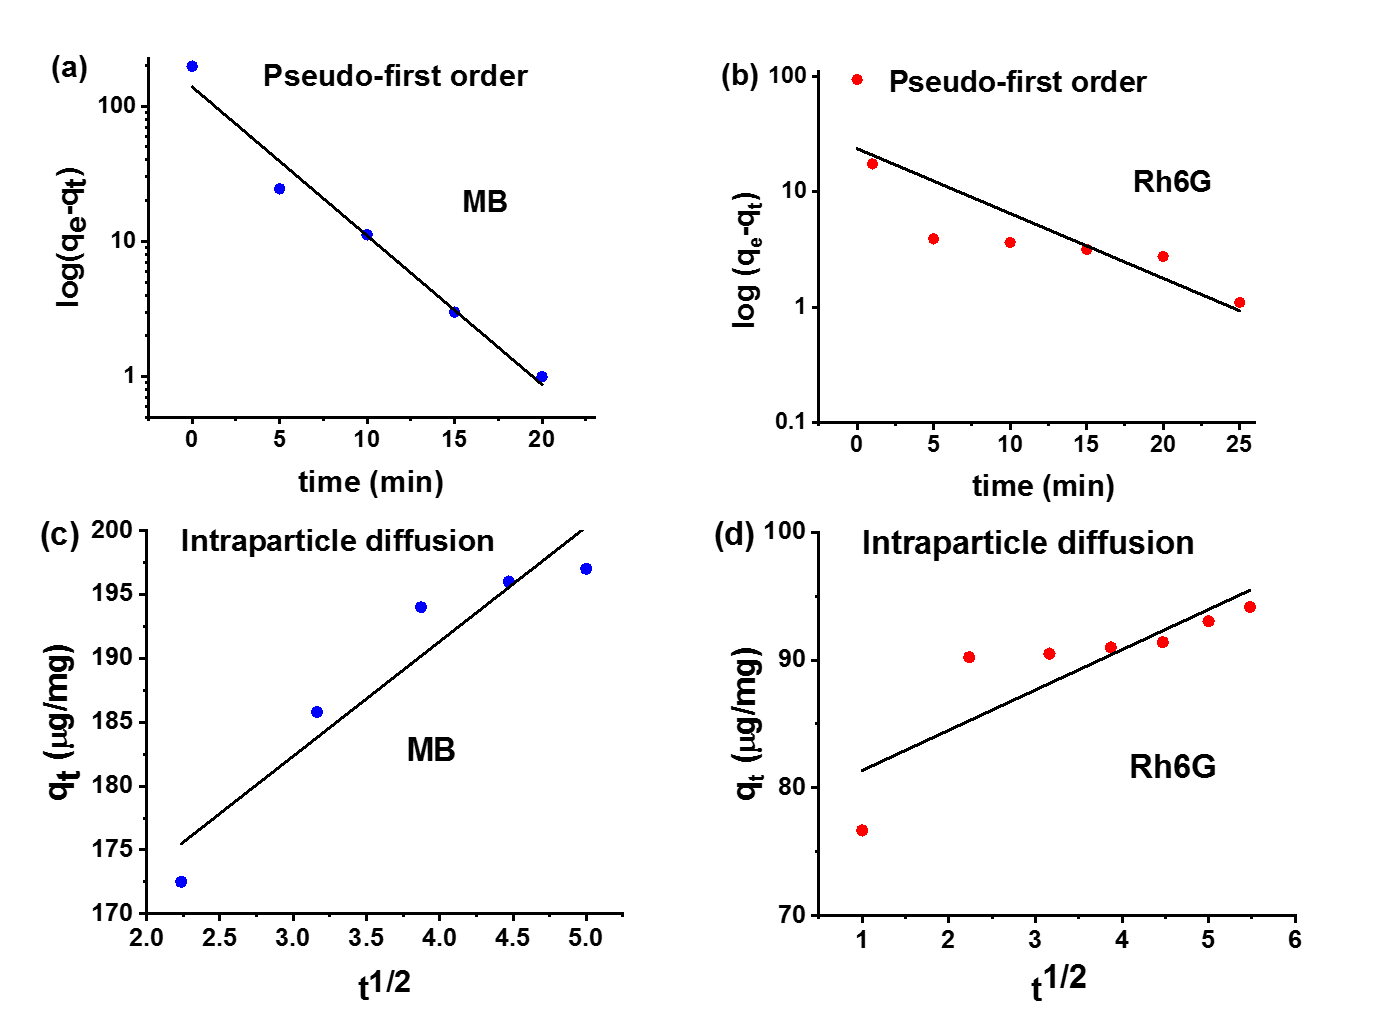


**Fig. S 10** Pseudo-first order (a and b) and intraparticle diffusion (c and d) kinetic plots for the adsorption of MB and Rh6G.

Table S3 Kinetic parameters for the adsorption of MB and Rh6G on HT-16-MnO­2

| Dyes | Pseudo-first order | | | Intraparticle diffusion | | |
| --- | --- | --- | --- | --- | --- | --- |
|  | qe (µg/mg) | k1 (1/min) | R2 | ki (µg mg-1 min1/2) | C | R2 |
| MB | 138.7 | 0.253 | 0.978 | 8.978 | 155.4 | 0.908 |
| Rh6G | 23.7 | 0.129 | 0.707 | 3.1516 | 78.20 | 0.729 |

**Recovery and reusability test of HT-16-MnO2**

A dye adsorption experiment was done by treating 100 mL of 130 mg/L of MB solution with 60 mg of HT-16-MnO2 for 30 min. To recover the used MnO2 from the dye treated solution, the solution was centrifuged and the obtained MnO2 precipitate was washed twice with water (2×12 mL) followed by four times washing with ethanol (4×12 mL). The washed MnO2 were dried in vacuum for 5 h. The recovered MnO2 (**HT-16-MnO2-R1**) from the treated solution found to be 54 mg (90%). To test the efficiency of recovered MnO2, 30 mg of recovered **HT‑16-MnO2-R1** was stirred with 50 mL of 130 mg/L of MB solution for 30 mins and absorption spectrum of the supernatant was recorded to find the adsorption capacity of recovered material. Further the used MnO2 was recovered by the same experimental procedure described above and obtained 26 mg (86%). The 18 mg of recovered MnO2 (**HT-16-MnO2-R2)** was swirled with 30 mL of 130 mg/L of MB solution for 30 min to test the efficiency of 2nd recovered MnO2 (**HT-16-MnO2-R2)** and the absorption spectrum of treated supernatant MB solution was recorded. The results of the reusability is well represented by the Fig. 3

A retention capacity of 74% and 59% were observed for two cycle. Experimental details has been incorporated in the supporting information.


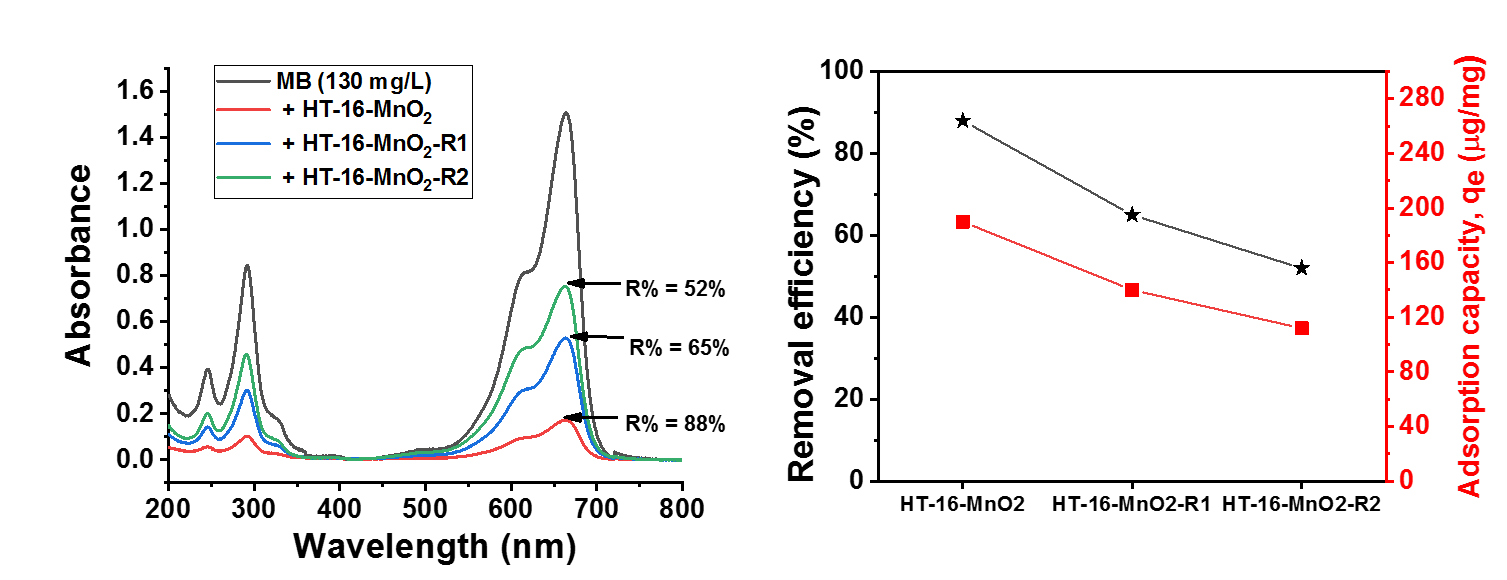


**Fig. S11** (a) Absorption spectra of untreated MB solution (black), after treatment with freshly prepared HT-16-MnO2 (red), after treatment with first recovered MnO2 (blue), after treatment with second recovered MnO2. (First and second recovered Mno2 is abbreviated as HT-16-MnO2-R1 and HT‑16‑MnO2-R2 respectively; solutions were diluted 20 time for UV-Vis spectra) (b) Removal efficiency and adsorption capacity of methylene blue dye by using fresh (HT-16-MnO2), first recovered (HT-16-MnO2-R1) and second recovered (HT-16-MnO2-R2) MnO2.

**Solvent optimization for oxidation with MnO2**

Benzhydrol (0.2 mmol, 36.8 mg) was stirred with HT‑16‑MnO2 (30.7 mg) in different solvents (3 mL) for 4 h, filtered, and the solvent was evaporated to dryness. The resulting crude reaction mixture was subjected to 1H NMR in CDCl3 and NMR conversion based on the appearance of new hydrogen peaks of product and disappearance of specific hydrogens of reactants using the following **Eqn. (3**)

(3)


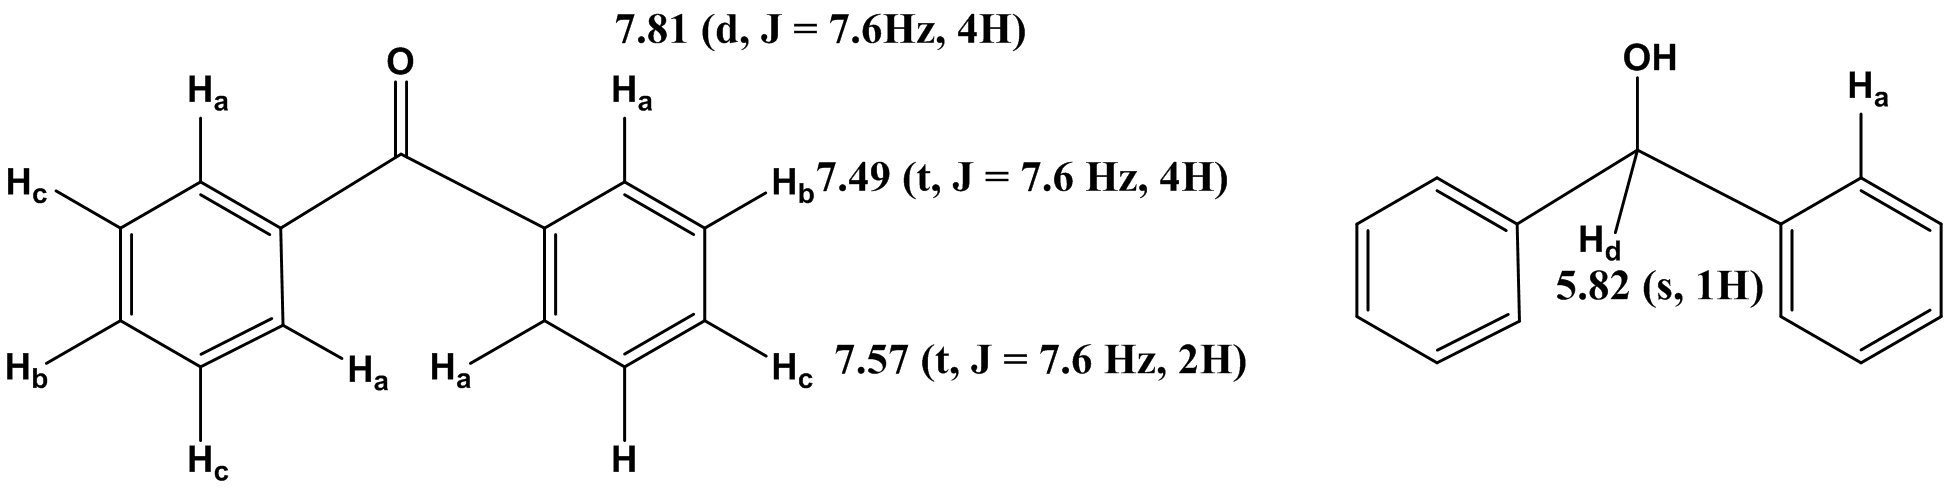


**Comparison with commercial MnO2**

To compare oxidation ability of HT-16-MnO2 with commercial MnO2 (**MnO2 (SA)**), 2‑iodobenzylalcohol (0.05 mmol, 11.7 mg) were stirred with 8 mg of MnO2 (SA) and HT‑16‑MnO2 in C6D6 (0.8 mL) for 7 h under similar conditions (bath temperature of 90 ˚C) and the reaction mixtures were filtered and analyzed by 1H NMR. These comparison reactions were performed using deuterated solvent C6D6 to monitor the conversion ratio by recording the 1HNMR of filtrate and compared the oxidation ability of synthesized and commercial MnO2. Since reactions were not complete in case of MnO2 (SA), the conversion ratio (reactant 2‑iodobenzylalcohol to product 2‑iodobenaldehyde) was calculated based on the integration of non‑overlapping peak areas. Peaks corresponding to unreacted 2‑iodobenzylalcohol and 2‑iodobenzaldehyde are given below with their integration data.

**(6a)** Peaks corresponding to **2-iodobenzylalcohol** (Unreacted starting material) - δ 7.58 (d, J = 8 Hz, 0.09H), 7.29 (d, J = 8 Hz, 0.09H), 6.98 (t, J = 8 Hz, 0.11H), 6.54 (t, J = 8 Hz, 0.09H), 4.33 (s, 0.18H).

**(6b) 2-iodobenzaldehyde** Reaction conditions, 1.5 eq. **MnO2 (SA)**(Comm. MnO2), C6D6, 90 ⁰C, 13 h, NMR conversion ratio 92% (**Fig S12** and **S13**); NMR conversion: 90%,1H NMR (400 MHz, C6D6), δ 9.94 (s, 0.89 H), 7.66 (d, J = 8 Hz, 0.90 H), 7.39 (d, J= 8 Hz, 0.92H), 6.71 (t, J = 8 Hz, 0.92H), 6.44 (t, J = 8 Hz, 0.92H).

Peaks corresponding to starting material in the 1H NMR indicated, 90‑92% conversion of reactant to product using **MnO2 (SA)**.

**Fig. S12** 1H NMR of 2‑iodobenzaldehyde with commercial MnO2 [MnO2 (SA)].

**Fig. S13** 1H NMR of 2‑iodobenzaldehyde (**6b**; MnO2 (SA)), expanded region showing peaks corresponding to unreacted 2‑iodobenzylalcohols.

**Fig. S14** 1H NMR of 2‑iodobenzaldehyde (**6b**; HT‑16‑MnO2).

**(6b) 2-iodobenzaldehyde** Reaction conditions, 1.5 eq. **HT-16-MnO2** (prepared MnO2), C6D6, 90 ⁰C, 13 h, NMR conversion ratio 99% (**Fig. S14**); 1H NMR (400 MHz, C6D6), δ 9.94 (s, 1H), 7.66 (d, J = 8 Hz, 1H), 7.39 (d, J = 8 Hz, 1H), 6.71 (t, J = 8 Hz, 1H), 6.44 (t, J = 8 Hz, 1H).

Peaks from the starting material were not observed indicating complete conversion.

**NMR Data**

**(2)** **Benzophenone;** Reaction conditions, 1.5 eq. HT-16-MnO2, toluene, 105 ⁰C, 2 h, Yield 98% (**Table 4,** entry 4)**;** 1H NMR (400 MHz, CDCl3), 7.81, δ (d, J = 7.6 Hz, 4H), 7.57 (t, J =7.6 Hz, 2H), 7.49 (t, J = 7.6 Hz, 4H).

**(3b) Anthracene-9-carboxaldehyde;** Reaction conditions, 1.5 eq. HT-16-MnO2, toluene, 105 ⁰C, 6 h, Yield 91% ( **Table 5,** entry 1);Yield: 91%, 1H NMR (400 MHz, CDCl3) δ 11.53 (s, 1H), 8.99 (d, 9.2 Hz, 2H), 8.70 (s, 1H), 8.07 (d, 8.4 Hz, 2H), 7.69 (m, 2H), 7.56 (t, 7.2 Hz, 2H).

# (4b) Biphenyl‑4‑carboxyladehyde; Reaction conditions, 1.5 eq. HT-16-MnO2, toluene, 105 ⁰C, 7 h, Yield 83% ( Table 5, entry 2)

# White solid, Yield: 83%, 1H NMR (400 MHz, CDCl3), δ 10.06 (s, 1H), 7.94 (d, J=6.4 Hz, 2H), 7.76 (d, J= 6.4 Hz, 2H), 7.64 (d, J= 6 Hz), 7.49 (m, 2H), 7.43 (m, 1H).

**(5b) 4‑methyl‑1‑imidazole** Reaction conditions, 1.5 eq. HT-16-MnO2, 1,4-dioxane, 90 ⁰C, 16 h, Yield 98% ( **Table 5,** entry 3);Yield: 98%, 1H NMR (400 MHz, CD3OD), δ 9.81 (s, 1H), 7.74 (s, 1H), 2.52 (s, 3H).

Note: - For 4-methylimidazole-5-methanol, the reaction mixture was filtered and dried (**Table 5**, entry 4) and the dried filtrate was dissolved in CD3OD and 1H NMR was recorded to find the ratio of substrate and product in the crude mixture.

**(7b) 2‑hydroxybenzaldehyde** Reaction conditions, 1.5 eq. HT-16-MnO2, C6D6 , 90 ⁰C, 24 h, Yield 91% ( **Table 5,** entry 5)**;** NMR conversion ratio 80%, 1H NMR (400 MHz, C6D6), δ 11.47 (s, 0.80 H, aldehydic), 9.15 (s, 0.80 H, hydroxyl), 6.92 (t, J = 8 Hz, 0.80 H), 6.80 (d, J = 8 Hz, 1H), 6.70 (d, J = 8 Hz, 1H), 6.45 (d, J = 8 Hz, 0.8 H).

**(8b) Cinnamaldehyde** Reaction conditions, 1.5 eq. HT-16-MnO2, C6D6, 90 ⁰C, 13 h, Yield 91% ( **Table 5,** entry 6)**;** 1H NMR (400 MHz, CDCl3), δ 9.72 (d, J = 7.6 Hz, 1H), 7.43-7.58 (m, 6H), 6.72 (m, 1H).

1. NaCh (sodium cholate), MB (methylene blue), Rh6G (rhodamine 6G), MO (methyl orange), BET (Brunauer-Emmett-Teller), MnO2 (SA) (commercial Sigma Aldrich MnO2), MnO2 (TB) (commercial Thomas Baker MnO2), HT-2-MnO2 (MnO2 prepared at High Temperature for 2 h of reaction), HT-8-MnO2 (MnO2 prepared at High Temperature for 8 h of reaction), HT-16-MnO2 (MnO2 prepared at High Temperature for 16 h), RT-9-MnO2 (MnO2 prepared at Room Temperature for 9 h of reaction). HT-16-MnO2-R1 and HT-16-MnO2-R2 recovered HT-16-MnO2 after use first and 2nd use. [↑](#footnote-ref-1)
2. [] He X, Bahk YK, Wang J (2017) Organic dye removal by MnO2 and Ag micromotors under various ambient conditions: The comparison between two abatement mechanisms. Chemosphere 184:601–608. [↑](#endnote-ref-1)
3. [] Dong WF, Zang LH, Li H (2013) Application of MnO2 materials to dye removal from aqueous solution by adsorption. Appl Mech Mater 361:760-763. [↑](#endnote-ref-2)
4. {] Abdel Salam M (2015) Synthesis and characterization of novel manganese oxide nanocorals and their application for the removal of methylene blue from aqueous solution. Chem Eng J 270:50–57. [↑](#endnote-ref-3)
5. [] Chen H, He J (2008) Facile synthesis of monodisperse manganese oxide nanostructures and their application in water treatment. J Phys Chem C 112:17540–17545. [↑](#endnote-ref-4)
6. [] Kim HM, Saito N, Kim DW (2019) Solution plasma-assisted green synthesis of MnO2 adsorbent and removal of cationic pollutant. J Chem 2019. https://doi.org/10.1155/2019/7494292 [↑](#endnote-ref-5)
7. [] Kim H, Watthanaphanit A, Saito N (2017) Simple Solution Plasma Synthesis of Hierarchical Nanoporous MnO2 for Organic Dye Removal. ACS Sustain Chem Eng 5:5842‑5851. [↑](#endnote-ref-6)
8. [] Saeed T, Naeem A, Mahmood T, et al (2020) Comparative study for removal of cationic dye from aqueous solutions by manganese oxide and manganese oxide composite. Int J Environ Sci Technol. https://doi.org/10.1007/s13762-020-02844-4 [↑](#endnote-ref-7)
9. [] Kuan WH, Chen CY, Hu (2011) Removal of methylene blue from water by γ-MnO2. Water Sci Technol 64:899-903. [↑](#endnote-ref-8)
10. [] Yang H, Li C, Zhang J (2020) Determining roles of in-situ measured surface potentials of phase controlled synthesized MnO2 nanostructures for superficial adsorption. Appl Surf Sci 513:145752. [↑](#endnote-ref-9)
11. [] Zhai R, Wan Y, Liu L, Zhang X, Wang W, Liu J, Zhang B (2012) Hierarchical MnO2 nanostructures: synthesis and their application in water treatment. Water Sci Technol 65:1054-1059. [↑](#endnote-ref-10)
